# Supplementary material
Source: publisher site journal article supplement (https://www.spandidos-publications.com/6689/downloadSupplementary)
Supplement: Supplementary file 1 [file downloadSupplementary]

## Sheet: Table S4
Table SIV. Differentially expressed genes associated with tumor tissue stemness.
Genes	Regulation
EEF1A2	Up
HLA-DRB5	Up
HLA-DQB1	Up
ALG1L	Up
GBP6	Up
ALB	Up
DUSP9	Up
NMRAL2P	Up
CELF5	Up
LOC646652	Up
GPX2	Up
HLA-DQA1	Up
UGT1A6	Up
LINC00942	Up
CALB1	Up
HPS3	Up
AKR1B10	Up
LOC101927136	Up
KRT17	Up
UNC5CL	Up
SOST	Up
SLC29A4	Up
HMGA1	Up
WNK2	Up
HLA-DRB1	Up
DLL3	Up
CASC9	Up
EFNA3	Up
KRT5	Up
KRT14	Up
KRT13	Up
DSP	Up
KRT6B	Up
IGF2BP3	Up
PPP1R14D	Up
RECQL4	Up
WDR62	Up
PAFAH1B3	Up
MYBL2	Up
KLC3	Up
CXCL14	Up
HOXB13	Up
CP	Up
COL17A1	Up
GRB14	Up
KRT19	Up
TNNC2	Up
IL31RA	Up
ALDH3A1	Up
HHLA2	Up
PITX1	Up
KRT6A	Up
DOC2A	Up
FAR2P1	Up
VTCN1	Up
HLA-G	Up
EYA2	Up
TNNT1	Up
CKS1B	Up
AKR1C3	Up
NMU	Up
CABYR	Up
TCAM1P	Up
CNMD	Up
PLAAT1	Up
AKR1C2	Up
LINC00858	Up
ATG9B	Up
COL9A2	Up
WFDC10B	Up
EDN2	Up
KRT1	Up
DLX5	Up
AURKB	Up
ASCL2	Up
CALML3	Up
SLC18A3	Up
PTPRZ1	Up
UBE2C	Up
PKP1	Up
PDIA2	Up
CST1	Up
KISS1R	Up
FAT2	Up
FGFBP1	Up
GSTA1	Up
PROC	Up
UCA1	Up
FAM83C	Up
TEDC2	Up
PRSS1	Up
DSG3	Up
CEACAM7	Up
LINC00673	Up
ZFR2	Up
PLAC1	Up
KRT16	Up
EFNA4	Up
ZIC2	Up
IGSF9	Up
USH1G	Up
UGT1A7	Up
CCNE1	Up
TXN	Up
FAM83F	Up
CCDC167	Up
SLC2A1	Up
SLC5A5	Up
UGT2B17	Up
E2F1	Up
SPP2	Up
ADGRF4	Up
GGCT	Up
C6orf132	Up
TONSL	Up
SLC25A10	Up
BNIP5	Up
AKR1C1	Up
KRT6C	Up
PTTG1	Up
TK1	Up
POF1B	Up
NR0B1	Up
DUXAP9	Up
PTGR1	Up
CLDN9	Up
PKMYT1	Up
CCDC162P	Up
ESPN	Up
REEP6	Up
EEF1AKMT4	Up
MUC20	Up
CERNA2	Up
BYSL	Up
CYP4F11	Up
NUF2	Up
SPRR3	Up
KCNMB2-AS1	Up
HAVCR1	Up
YBX2	Up
CCNB2	Up
NXPH4	Up
PADI3	Up
HOXC10	Up
CGB7	Up
NELL1	Up
PCSK1N	Up
CENPU	Up
SAPCD2	Up
SERPINB5	Up
KIF2C	Up
HOXC13	Up
KRTAP4-1	Up
ASF1B	Up
SLC39A4	Up
PSMG3	Up
EZH2	Up
BDH1	Up
C10orf90	Up
RCC1	Up
CTRB2	Up
CDC20	Up
UBE2T	Up
DMBX1	Up
NEFL	Up
BZW2	Up
HGH1	Up
HMGN2P46	Up
OIP5	Up
ORC6	Up
HSPB1	Up
TRIM16L	Up
NQO1	Up
NCCRP1	Up
INA	Up
LINC01977	Up
ZWINT	Up
CDC25C	Up
KIFC1	Up
MRPL47	Up
SOX2	Up
MAJIN	Up
STAP2	Up
CDC45	Up
GABRE	Up
TMEM40	Up
SLC6A11	Up
ADAM15	Up
PTHLH	Up
HJURP	Up
LOC101927189	Up
ATAT1	Up
SLC44A5	Up
TAS2R1	Up
GCLC	Up
LOC101929705	Up
MRPL2	Up
BAAT	Up
PAX9	Up
TXNDC17	Up
LINC00896	Up
CCNB1	Up
IQGAP3	Up
SPRR2A	Up
PERP	Up
C19orf48	Up
NME1	Up
ADH7	Up
POLR3K	Up
CKMT1B	Up
PCAT6	Up
TEKT5	Up
DBNDD1	Up
METTL11B	Up
CLDN6	Up
DCST2	Up
SAMD10	Up
POLR1C	Up
ACKR2	Up
CYC1	Up
RHCG	Up
SFN	Up
SLC7A11	Up
BPHL	Up
NPIPB12	Up
NEK2	Up
GINS1	Up
MAP7D2	Up
GJA9	Up
TUBB2B	Up
PLK1	Up
DNAH14	Up
CAPN13	Up
FAM118A	Up
C10orf99	Up
GLYATL2	Up
CDCA8	Up
SLC47A2	Up
SMC1B	Up
CCNE2	Up
CENPM	Up
SOX21-AS1	Up
MUC12	Up
KLHL35	Up
IGFL1	Up
FUT9	Up
RAET1L	Up
C1QTNF12	Up
TMPRSS6	Up
CYP2D6	Up
MCM4	Up
PLEKHN1	Up
ZNF695	Up
IGSF11	Up
MSL3P1	Up
MMP11	Up
TRPM8	Up
CERS3	Up
MTFP1	Up
LINC01559	Up
SORD	Up
RPP21	Up
MDK	Up
H2BC12	Up
ITPKA	Up
CAPN14	Up
LINC02864	Up
PNMA3	Up
SRXN1	Up
GNG4	Up
ATP4A	Up
PLA2G2F	Up
STXBP5L	Up
ASS1	Up
LINC00514	Up
PPP2R2C	Up
EFNA2	Up
ZIC5	Up
BBOX1-AS1	Up
POU6F2	Up
DNAH11	Up
ZSWIM1	Up
IGFBP3	Up
RAB40C	Up
CHODL	Up
TNFRSF18	Up
KLK6	Up
CHAF1B	Up
EXOSC5	Up
TF	Up
HHIPL2	Up
SPRR1B	Up
LOC107985532	Up
TPX2	Up
ARTN	Up
CLTRN	Up
BARX1	Up
RMI2	Up
CSTA	Up
PKP3	Up
TMPRSS11E	Up
MIR205HG	Up
UPK1B	Up
AKR7A3	Up
SLURP2	Up
GRIP1	Up
RNF183	Up
POU3F2	Up
ENO1	Up
MCRIP2	Up
FAM83B	Up
LINC00668	Up
MIF	Up
PLEKHG4B	Up
TMPRSS11D	Up
ENPP3	Up
PRR19	Up
TMEM145	Up
CTSV	Up
PYCR1	Up
GJB3	Up
AURKA	Up
ACY3	Up
ID4	Down
CSRNP1	Down
FAM107A	Down
DIPK2B	Down
LDB2	Down
LYVE1	Down
SOX17	Down
EDNRB	Down
CD36	Down
SLIT2	Down
EMCN	Down
KLF6	Down
FOXF1	Down
PEAR1	Down
S1PR1	Down
TSPAN18	Down
FOS	Down
PDE2A	Down
MMRN2	Down
PTPRB	Down
ADAMTS15	Down
LPL	Down
VWF	Down
CDH5	Down
ADAMTSL3	Down
STARD8	Down
CYYR1	Down
FOSB	Down
ARC	Down
CD93	Down
ZNF423	Down
CXCL2	Down
FGD5	Down
ZFP36	Down
FZD4	Down
RHOJ	Down
LHFPL6	Down
CAVIN1	Down
CAVIN2	Down
KIF26A	Down
CSPG4	Down
SEMA5A	Down
SILC1	Down
EGR1	Down
GFOD1	Down
ADAMTS1	Down
PDGFB	Down
CNTFR	Down
SRPX	Down
MYCT1	Down
TIMP3	Down
PLPP3	Down
PALM2AKAP2	Down
MCAM	Down
SYPL2	Down
HEG1	Down
TAMALIN	Down
AGTR1	Down
ANGPTL1	Down
JAM2	Down
RECK	Down
STARD9	Down
ITPRIP	Down
FBLN1	Down
CCBE1	Down
ARHGAP6	Down
SEMA6A	Down
MYADM	Down
TGFBR3	Down
SHANK3	Down
ITLN1	Down
GUCY1A2	Down
ENPEP	Down
BMPER	Down
TCF21	Down
JUN	Down
NFASC	Down
ATP1B2	Down
FLNC	Down
AOC3	Down
FHL1	Down
KANK2	Down
APOLD1	Down
KCNH5	Down
ABLIM3	Down
BCHE	Down
SVEP1	Down
CNRIP1	Down
PLAT	Down
OLFML2A	Down
TEK	Down
INKA2	Down
PKNOX2	Down
ADRA1A	Down
MYOC	Down
NR4A1	Down
IL6	Down
GIPC2	Down
HAS1	Down
AMOTL1	Down
FCGR3B	Down
KLF4	Down
ADGRL2	Down
OLFML1	Down
SPARCL1	Down
GNG11	Down
EYA4	Down
SOCS3	Down
COL5A3	Down
CXCL3	Down
PGM5P4	Down
PPM1F	Down
TAL1	Down
GRK5	Down
JAM3	Down
PCDHGB7	Down
STARD13	Down
MSRB3	Down
TRPC6	Down
DPT	Down
FHL5	Down
PDK4	Down
PTPN21	Down
SASH1	Down
IGSF10	Down
SLC5A4	Down
KCTD16	Down
LRRTM2	Down
LAMA4	Down
DLC1	Down
RHOB	Down
EML1	Down
GAS1	Down
SOGA3	Down
LOC100128593	Down
RXFP1	Down
DKK2	Down
EPAS1	Down
CLEC14A	Down
SYDE1	Down
SLC25A25	Down
DACH1	Down
SLC46A2	Down
TNXA	Down
TAMALIN-AS1	Down
MGAT3	Down
KCNMB4	Down
ARHGEF10	Down
ROBO4	Down
ATF3	Down
SGCG	Down
GPM6A	Down
GAB2	Down
PRSS35	Down
NTRK3	Down
FIBIN	Down
PKHD1L1	Down
LEPR	Down
ACACB	Down
EDNRA	Down
FAM13C	Down
KANK4	Down
FLT4	Down
FLI1	Down
HPSE2	Down
TMEM47	Down
PDGFRB	Down
CSF3	Down
KL	Down
FEZ1	Down
HSPB8	Down
EMP1	Down
PALD1	Down
PI16	Down
TIE1	Down
TNFRSF10D	Down
KLF2	Down
C20orf202	Down
NCKAP5	Down
DPYSL2	Down
KLF9	Down
ABCA8	Down
SPTBN1	Down
IL33	Down
BMX	Down
FAM110D	Down
TACC1	Down
ERG	Down
RNF122	Down
PHYHIPL	Down
DUSP1	Down
GHR	Down
C14orf132	Down
DOCK4	Down
GATA6	Down
SLIT3	Down
CXCL12	Down
EFNB2	Down
PPP1R15A	Down
SCN4B	Down
BMP2	Down
JCAD	Down
KCNJ8	Down
SOCS2	Down
LINC02202	Down
AKT3	Down
AFAP1L1	Down
CXCR2	Down
LINC00968	Down
PCDH17	Down
ABCA10	Down
GSTM5	Down
STX11	Down
SYT4	Down
CCDC85A	Down
EPB41L2	Down
TMEM204	Down
ADARB2	Down
RFLNB	Down
ACVRL1	Down
FAM124B	Down
PRR4	Down
DOK6	Down
CCN2	Down
ARG1	Down
NR5A2	Down
EBF2	Down
PDE1C	Down
CASKIN2	Down
AHNAK	Down
HID1-AS1	Down
TBX3	Down
ADGRA2	Down
JUNB	Down
SHISA3	Down
SOX7	Down
CRISPLD2	Down
DENND2A	Down
BCL6B	Down
TGFBR2	Down
GABRB2	Down
FOLR3	Down
RNF182	Down
PCDHGA11	Down
SRL	Down
NR2F1	Down
ADAMTS9-AS1	Down
EBF1	Down
CTXND1	Down
MME	Down
SMIM38	Down
ABI3BP	Down
RAPGEF4	Down
ADAMTSL1	Down
LAMB4	Down
ABCC9	Down
LRRC70	Down
PRKG1	Down
ZNF331	Down
FAM162B	Down
ITM2A	Down
GDF10	Down
EGR3	Down
FRMD3	Down
CLDN11	Down
LINC02587	Down
KCNJ12	Down
FGF2	Down
CTCFL	Down
ADAMTS9-AS2	Down
GIMAP8	Down
PTX3	Down
ACSS3	Down
ECM2	Down
MGAM	Down
GCOM1	Down
ABCG2	Down
EREG	Down
CASS4	Down
HMGCS2	Down
LOXHD1	Down
ADAM33	Down
ELAPOR2	Down
GAS1RR	Down
ADGRL4	Down
DCHS1	Down
NID1	Down
NUAK1	Down
CSGALNACT1	Down
C7	Down
NLRP3	Down
KCNT2	Down
DAAM2	Down
MFAP4	Down
MGAT4C	Down
PTPRG	Down
CXCR1	Down
LOC100287387	Down
SLC6A19	Down
THSD1	Down
IL17D	Down
ACKR1	Down
SELE	Down
PTPRM	Down
PADI4	Down
CCL14	Down
BTG2	Down
CYP3A7	Down
PER1	Down
OVCH1-AS1	Down
RP1L1	Down
TNFAIP3	Down
PRICKLE1	Down
STXBP6	Down
DCN	Down
CAV1	Down
SYNPO2L	Down
CMTM2	Down
ZFPM2	Down
MEIS2	Down
SLITRK3	Down
CALCRL	Down
RUNX1T1	Down
ZEB2	Down
IL1RL1	Down
COL6A6	Down
PCOLCE2	Down
LINC01354	Down
SLC6A18	Down
PGR	Down
PDZRN3	Down
ST8SIA6	Down
PLEKHH2	Down
PLSCR4	Down
ABCA9	Down
